# Supplementary material for: A nutrient mediates intraspecific competition between rodent malaria parasites in vivo
Source: Proc Biol Sci. 2017 Jul 26;284(1859):20171067. doi: 10.1098/rspb.2017.1067 (PMC5543226; doi:10.1098/rspb.2017.1067)

Change from Initial Red Blood Cell Density  
( $\times 10^6/\mu\text{l}$  Blood)

### Single Infections

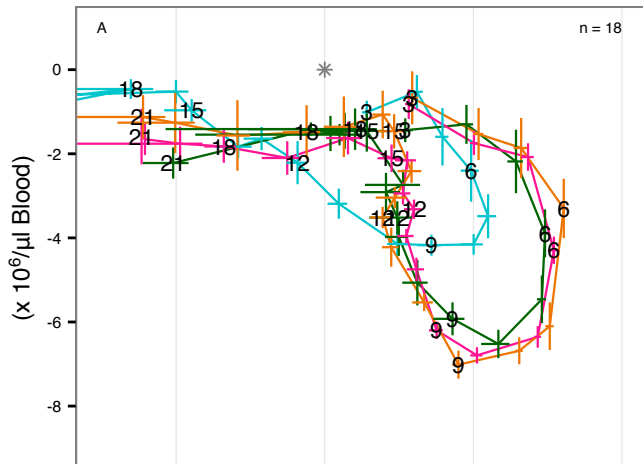

### Mixed Infections

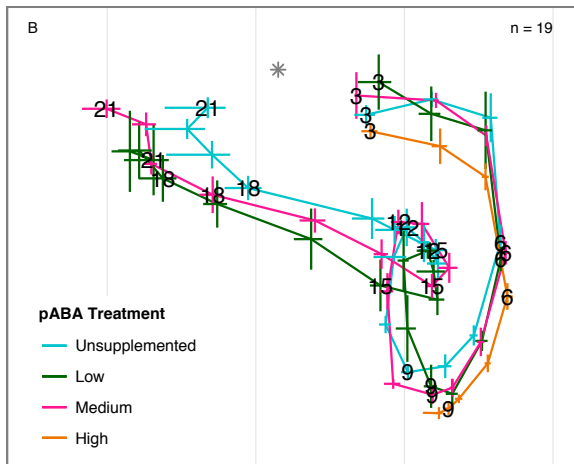

Change from Initial Weight  
(grams)

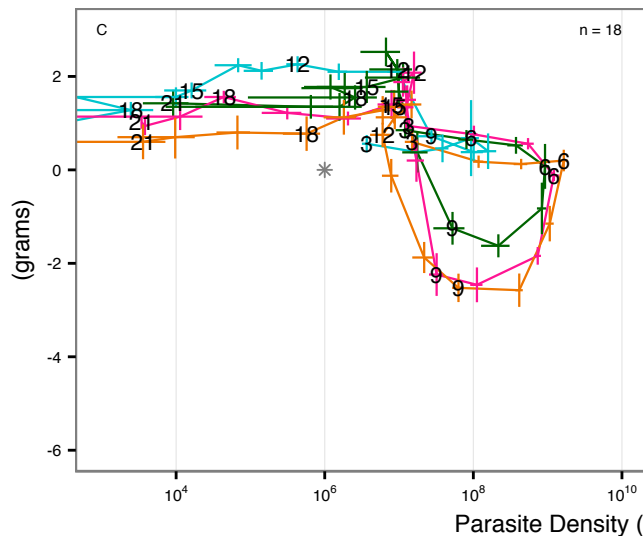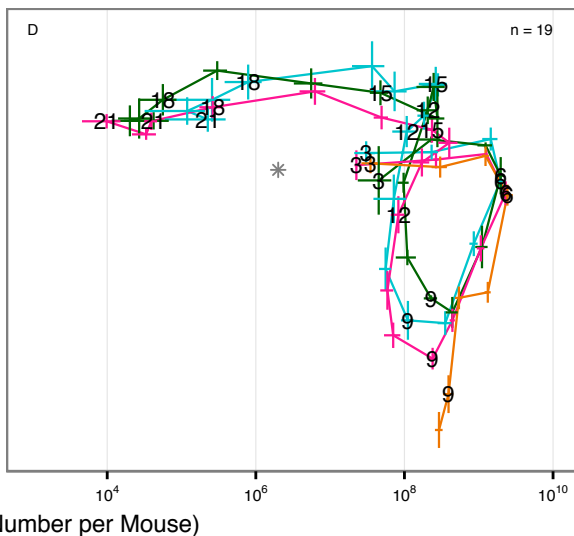

Supplement: Figure S5: The impact of pABA supplementation on the relationship between pathogen burden & disease in single and mixed infections [file rspb20171067supp5.pdf]
