# Supplementary material for: A nutrient mediates intraspecific competition between rodent malaria parasites in vivo
Source: PubMed Central journal article supplement (PMC5543226; doi:10.1098/rspb.2017.1067), 2017-07-26

# Single Infections

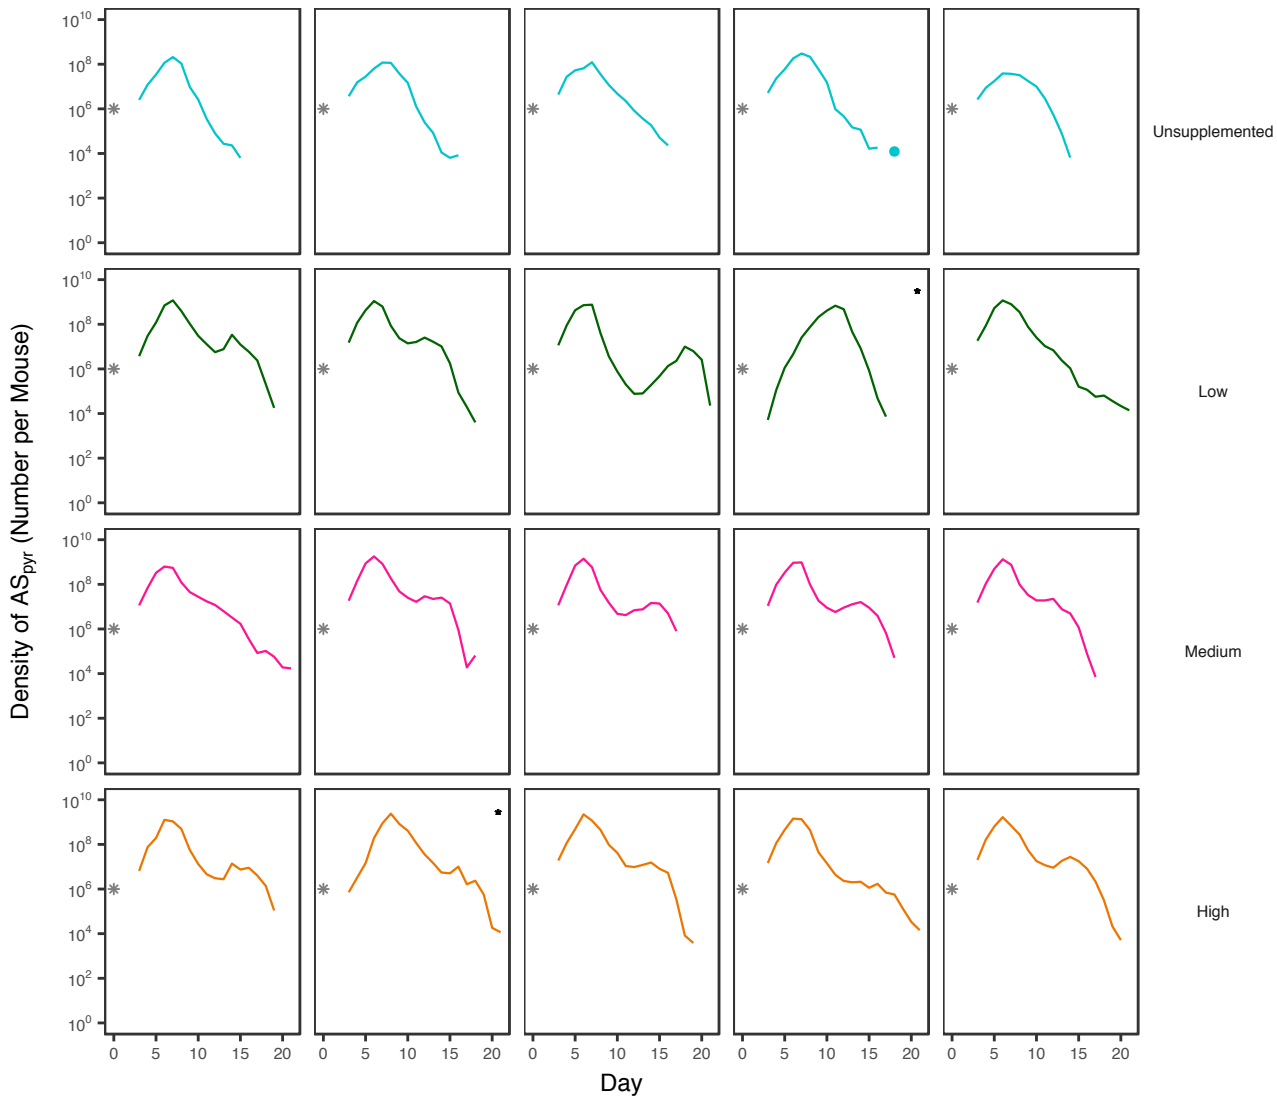

Supplement: rspb20171067supp1.pdf [file rspb20171067supp1.pdf]
